# Supplementary material for: Effect of calcium on relieving berry cracking in grape (Vitis vinifera L.) ‘Xiangfei’
Source: PeerJ. 2020 Sep 15;8:e9896. doi: 10.7717/peerj.9896 (PMC7500324; doi:10.7717/peerj.9896)
Supplement: Supplemental Information 1 [file peerj-08-9896-s001.xlsx]

## Sheet: Sheet1
Table S1. Gene annotation, FPKM, and fold changes (Log2 ratio) of DEGs involved in cell wall metabolism.
Gene_id	Gene annotation	FPKM						Log2FC(Ca1/CK1)	Log2FC(Ca2/CK2)	Log2FC(Ca3/CK3)
		CK1	CK2	CK3	Ca1	Ca2	Ca3
VIT_04s0044g01020	Pectinmethylesterase	8.48	10.52	5.73	6.18	4.09	3.11	-0.428341	-1.33917	-0.834775
VIT_06s0009g02590	Pectinmethylesterase	41.5	48.42	17.12	9.38	9.43	7.65	-2.13083	-2.33424	-1.11257
VIT_09s0002g00320	Pectinmethylesterase	25.29	34.09	1.16	24.55	45.26	5.17	-0.0305111	0.434832	2.20957
VIT_10s0116g00590	Pectinmethylesterase	15.4	8.2	12	11.54	16.73	10.16	-0.403081	1.05534	-0.190383
VIT_11s0016g00300	Pectinmethylesterase	7.4	6.79	3.39	23.82	1.99	8.44	0.19973	-0.856083	1.21723
VIT_11s0016g00330	Pectinmethylesterase	14.61	12.04	0.81	17.8	19.15	2.35	0.303842	0.690023	1.62242
VIT_13s0047g00230	Pectinmethylesterase	4.53	3.6	1.12	6.98	1.29	1.55	0.645048	-1.44905	0.526251
VIT_15s0048g00500	Pectinmethylesterase	1.4	2.81	70.92	0.25	2.54	9.76	-2.45191	-0.124528	-2.81261
VIT_15s0048g00510	Pectinmethylesterase	0.33	17.33	19.46	0.86	1.06	5.38	1.37977	-4.00126	-1.80705
VIT_16s0098g01900	Pectinmethylesterase	64.24	32.89	11.85	97.83	33.56	23.67	0.60512	0.0192102	1.00054
VIT_11s0016g00590	PME inhibitor	123.51	170.11	75.2	388.73	356.91	195.24	1.68643	1.09421	1.42279
VIT_16s0022g00940	PME inhibitor	16.55	10.44	5.03	8.1	6.89	5.54	-1.01183	-0.573949	0.187479
VIT_07s0005g00890	Polygalacturonase	6.59	4.76	1.97	4.42	2.06	3.15	-0.528062	-1.19722	0.713199
VIT_07s0005g02590	Polygalacturonase	7.13	9.99	6.51	4.94	4.43	4.74	-0.514017	-1.21501	-0.531067
VIT_08s0007g08330	Polygalacturonase	6.15	0.72	2	8.65	0.46	0.75	0.505306	-0.629231	-1.36774
VIT_11s0016g00720	Polygalacturonase	23.83	26.34	21.61	13.05	11.61	11.02	-0.853008	-1.15471	-0.926741
VIT_13s0139g00110	Polygalacturonase	17.65	17.73	14.21	8.95	7.13	11.34	-2.15943	-2.38163	-1.55165
VIT_01s0137g00240	Pectate lyase	268.4	46.48	2.22	276.71	73.9	9.82	0.0586827	0.694666	2.19751
VIT_13s0019g04910	Pectate lyase	101.22	57.17	16.32	164.48	94.95	70.88	0.713317	0.757804	2.1679
VIT_17s0000g09810	Pectate lyase	115.97	141.75	221.07	89.76	55.32	223.8	-0.35181	-1.33166	0.0661354
VIT_05s0051g00590	Pectate lyase	665.62	587.18	164.16	196.53	152.82	179.56	-1.7497	-1.9162	0.17858
VIT_04s0023g02690	Beta-galactosidase	28.31	20.41	8.58	13.35	8.53	7.51	-1.08544	-1.24442	-0.169929
VIT_09s0002g02120	Beta-galactosidase	121.86	143.72	41.61	47.38	108.43	57.87	-1.35297	-0.380714	0.525262
VIT_11s0016g02200	Beta-galactosidase	35	49.18	45.85	19.69	24.7	26.99	-0.886481	-1.02315	-0.774382
VIT_13s0067g03000	Beta-galactosidase	28.04	30.86	35.87	14.84	13.55	16.59	-0.881368	-1.10682	-1.02225
VIT_08s0040g00320	alpha-L-arabinofuranosidase	156.87	141.76	107.96	69.22	87.52	62.78	-1.16996	-0.670058	-0.732925
VIT_02s0025g01380	Endoglucanase	89.32	64.65	30.44	56.04	23.07	32.69	-0.710616	-1.51386	0.113486
VIT_07s0005g00740	Endoglucanase	8.21	2.89	0.81	12.01	3.16	2.37	0.560866	0.155296	1.58953
VIT_18s0001g14040	Endoglucanase	59.31	27.14	3.77	39.2	22	11.6	-0.585485	-0.277691	1.67058
VIT_05s0077g01150	Beta-glucosidase	235.31	755.02	1555.23	96.88	676.16	424.33	-1.26153591082	-0.133381	-1.82551
