# Supplementary material for: Effect of calcium on relieving berry cracking in grape (Vitis vinifera L.) ‘Xiangfei’
Source: PeerJ. 2020 Sep 15;8:e9896. doi: 10.7717/peerj.9896 (PMC7500324; doi:10.7717/peerj.9896)
Supplement: Supplemental Information 6 [file peerj-08-9896-s006.xlsx]

## Sheet: raw data
Figure 3
	diameter				AVG	STDEV		TSS			AVG	STDEV
20DAFB	Ca	10.02	10.81	11.65	10.8267	0.815128	Ca	2.9	2.85	2.95	2.9	0.05
	CK	10.25	11.24	11.53	11.0067	0.671143	CK	3.31	3.38	3.34	3.34333	0.0351188
23DAFB	Ca	11.13	11.42	12.32	11.6233	0.620511	Ca	3.45	2.98	3	3.14333	0.265769
	CK	11.43	12.22	12.34	11.9967	0.494402	CK	3	3.05	3.1	3.05	0.05
26DAFB	Ca	12.87	13.79	13.33	13.33	0.46	Ca	3.1	3.25	3.22	3.19	0.0793725
	CK	13.94	12.81	14.25	13.6667	0.757914	CK	3.55	3.22	3.48	3.41667	0.173877
29DAFB	Ca	14.43	15.38	14.55	14.7867	0.517333	Ca	3.58	3.85	3.95	3.79333	0.191398
	CK	15.53	14.39	15.43	15.1167	0.631295	CK	3.5	3.65	3.45	3.53333	0.104083
32DAFB	Ca	15.03	16.35	16.68	16.02	0.873098	Ca	4.42	4.25	4.21	4.29333	0.111505
	CK	15.89	15.23	15.67	15.5967	0.336056	CK	4.55	4.23	4.34	4.37333	0.162583
35DAFB	Ca	15.68	16.64	16.88	16.4	0.63498	Ca	4.47	4.64	4.59	4.56667	0.0873689
	CK	16.32	15.73	15.84	15.9633	0.313741	CK	4.63	5.03	4.82	4.82667	0.200083
38DAFB	Ca	15.89	16.95	16.88	16.5733	0.592818	Ca	5.11	5.24	5.31	5.22	0.101489
	CK	16.98	16.31	15.92	16.4033	0.536128	CK	5.47	5.56	5.85	5.62667	0.198578
41DAFB	Ca	18.21	17.41	18.73	18.1167	0.664931	Ca	8.03	7.74	7.23	7.66667	0.40501
	CK	17.83	18.55	18.98	18.4533	0.581062	CK	7.97	8.72	8.93	8.54	0.504678
44DAFB	Ca	18.73	18.17	19.53	18.81	0.68352	Ca	9.32	8.84	9.19	9.11667	0.248261
	CK	18.42	19.32	19.91	19.2167	0.750355	CK	8.25	9.39	9.62	9.08667	0.733644
47DAFB	Ca	18.95	19.41	19.78	19.38	0.415812	Ca	10.47	11.21	10.95	10.8767	0.375411
	CK	19.13	20.15	20.29	19.8567	0.633193	CK	11.74	10.94	11.34	11.34	0.4
50DAFB	Ca	19.43	20.22	19.79	19.8133	0.395517	Ca	10.66	12.17	11.95	11.5933	0.815741
	CK	20.08	20.53	19.84	20.15	0.350286	CK	13.14	12.43	12.21	12.5933	0.486038
53DAFB	Ca	19.74	19.73	20.81	20.0933	0.620672	Ca	13.24	12.58	12.79	12.87	0.337194
	CK	19.51	20.95	20.13	20.1967	0.722311	CK	13.04	12.07	12.32	12.4767	0.50362
56DAFB	Ca	19.87	20.43	21.14	20.48	0.636475	Ca	13.98	13.42	13.18	13.5267	0.410528
	CK	20.4	20.95	20.68	20.6767	0.275015	CK	12.49	13.36	13.15	13	0.453982
59DAFB	Ca	20.44	20.36	21.62	20.8067	0.705502	Ca	14.23	14.52	13.79	14.18	0.36756
	CK	20.47	21.11	21.68	21.0867	0.605337	CK	12.86	13.69	13.88	13.4767	0.542433
62DAFB	Ca	20.88	21.12	21.99	21.33	0.584038	Ca	14.31	15.03	14.68	14.6733	0.360046
	CK	21.13	21.69	21.88	21.5667	0.389915	CK	14.46	16.13	14.84	15.1433	0.875348
65DAFB	Ca	20.96	21.58	22.19	21.5767	0.615007	Ca	14.38	15.26	15.44	15.0267	0.567215
	CK	21.51	21.94	21.01	21.4867	0.465439	CK	15.98	14.66	15.29	15.31	0.660227
68DAFB	Ca	21.94	22.22	21.04	21.7333	0.61655	Ca	15.16	15.68	16.18	15.6733	0.510033
	CK	21.65	22.26	20.98	21.63	0.640234	CK	16.2	14.83	15.15	15.3933	0.716682
71DAFB	Ca	22.24	21.58	21.21	21.6767	0.52176	Ca	15.63	16.02	16.94	16.1967	0.672632
	CK	21.63	22.28	21.85	21.92	0.330606	CK	15.49	16.13	16.23	15.95	0.401497
74DAFB	Ca	22.48	21.83	21.25	21.8533	0.615332	Ca	16.94	16.02	16.19	16.3833	0.489524
	CK	22.32	22.13	20.72	21.7233	0.87409	CK	16.73	15.31	15.7	15.9133	0.733644
Figure 4
Fruit-cracking incidence(%)													AVG	AVG	SD
40 DAFB	Calcium	replicate1	0	4.6154	2	0	3.9216	1.7241	0	0	2.381	0	1.46421
		replicate2	0	3.8462	2.8986	0	0	1.6129	3.9216	0	0	1.6949	1.39742	1.13194	0.518737
		replicate3	0	0	1.4493	0	2.0408	0	0	0	1.8519	0	0.5342
	Control	replicate1	2.1739	0	0	2.439	0	0	0	1.8868	0	1.6667	0.81664
		replicate2	0	7.8431	0	0	0	1.9608	0	0	0	3.8462	1.36501	0.96843	0.346582
		replicate3	0	0	0	3.0769	0	0	2.2727	0	1.8868	0	0.72364
47 DAFB	Calcium	replicate1	3.5714	0	4.7619	0	0	0	4	3.3333	0	0	1.56666
		replicate2	0	6.6667	0	3.8462	0	0	8.1967	0	0	0	1.87096	1.89506	0.341084
		replicate3	4.1667	0	0	2	10.4167	0	1.6667	0	4.2254	0	2.24755
	Control	replicate1	0	3.9216	0	0	3.5088	7.5472	0	1.8182	1.8519	0	1.86477
		replicate2	5.6604	0	5.6604	3.5088	0	5.3571	0	10.7143	0	1.6949	3.25959	3.12133	1.19346
		replicate3	8.7719	10.7143	0	4	0	6.3492	1.8182	6.8966	0	3.8462	4.23964
54 DAFB	Calcium	replicate1	8.9286	12.5	6.5574	11.5385	16	10.5263	15.3846	0	3.125	13.4615	9.80219
		replicate2	20.7547	24.0741	16.3265	6.8966	0	3.125	13.4615	7.4074	3.7037	3.9216	9.96711	10.1869	0.529898
		replicate3	11.1111	5.4545	13.7931	9.8039	14.5833	15.6863	10.3448	3.9216	5.3571	17.8571	10.7913
	Control	replicate1	50.9091	50	39.2157	47.2727	37.5	56.8966	63.6364	60.4167	53.3333	48.0769	50.7257
		replicate2	53.8462	60.7143	46	64.1509	65.0794	29.4118	54.5455	43.6364	62.2642	48.3333	52.7982	51.0637	1.59264
		replicate3	66.6667	43.1373	52.2727	60.4651	52.6316	42.8571	46.4286	47.1698	46.1538	38.8889	49.6672
61 DAFB	Calcium	replicate1	38	30	44.2308	29.8246	34.6154	30.1887	25.4902	27.2727	29.4118	27.2727	31.6307
		replicate2	26.9231	26.5306	28.2609	32	25.9259	25.4902	27.451	27.0833	29.3103	31.1475	28.0123	28.1367	3.43341
		replicate3	32.0755	24.5283	26.4151	28.5714	18.1818	24	23.3333	22	25.4902	23.0769	24.7672
	Control	replicate1	84.4828	78.9474	77.193	80.3922	83.3333	69.2308	72.9167	70.6897	83.0189	78.125	77.833
		replicate2	82.7586	59.2593	90.566	76.1905	89.0909	82.3529	100	92.3077	84.3137	94.1176	85.0957	82.2865	3.9006
		replicate3	82.4561	90.3846	91.6667	74.2424	74.5455	86.4407	67.7419	100	98.2456	73.5849	83.9308
		Crakcing rate	40 DAFB	47 DAFB	54 DAFB	61 DAFB
		Ca	1.13194	1.89505	10.1869	28.1367
		Control	0.96843	3.12132	51.0637	82.2865
		STDEV-Ca	0.518736	0.341073	0.529909	3.4334
		STDEV-Control	0.346579	1.19346	1.59263	3.90062
cumulative severity index
40 DAFB	Calcium	replicate1	0	0.0599	0.0399	0	0.0399	0.02	0	0	0.0599	0	0.02196
		replicate2	0	0.0399	0.0798	0	0	0.02	0.0399	0	0	0.0599	0.02395	0.0173033	0.00983941
		replicate3	0	0	0.02	0	0.02	0	0	0	0.02	0	0.006
	Control	replicate1	0.0415	0	0	0.0207	0	0	0	0.0207	0	0.0415	0.01244
		replicate2	0	0.1244	0	0	0	0.0207	0	0	0	0.0829	0.0228	0.0179667	0.00521468
		replicate3	0	0	0	0.0829	0	0	0.0415	0	0.0622	0	0.01866
47 DAFB	Calcium	replicate1	0.0777	0	0.0583	0	0	0	0.0389	0.0777	0	0	0.02526
		replicate2	0	0.136	0	0.0389	0	0	0.1943	0	0	0	0.03692	0.0362667	0.010695
		replicate3	0.136	0	0	0.0194	0.1748	0	0.0194	0	0.1166	0	0.04662
	Control	replicate1	0	0.0798	0	0	0.0399	0.1198	0	0.02	0.02	0	0.02795
		replicate2	0.0599	0	0.0599	0.0399	0	0.0998	0	0.1597	0	0.0399	0.04591	0.04458	0.0160065
		replicate3	0.1397	0.1397	0	0.0599	0	0.0798	0.02	0.0998	0	0.0599	0.05988
54 DAFB	Calcium	replicate1	0.1423	0.2439	0.1016	0.2033	0.2236	0.1829	0.2236	0	0.0407	0.2642	0.16261
		replicate2	0.3049	0.4268	0.2642	0.1829	0	0.0407	0.2236	0.1626	0.0813	0.0407	0.17277	0.178873	0.0200252
		replicate3	0.2846	0.122	0.2033	0.2236	0.2439	0.2236	0.1626	0.0813	0.1829	0.2846	0.20124
	Control	replicate1	1.163	1.2253	0.7061	0.9969	0.7684	1.163	1.433	1.2669	0.7892	0.8723	1.03841
		replicate2	0.9969	1.2876	0.8723	1.4538	1.4953	0.4154	0.9969	0.9553	1.4953	0.9138	1.08826	1.07718	0.0345877
		replicate3	1.6822	1.163	0.9553	1.2876	1.2461	0.9138	0.9969	1.08	0.9969	0.7269	1.10487
61 DAFB	Calcium	replicate1	0.6573	0.6785	0.9754	0.6149	0.9542	0.7846	0.4241	0.4453	0.4877	0.5301	0.65521
		replicate2	0.4453	0.3817	0.5725	0.5301	0.4029	0.3393	0.4029	0.5513	0.5725	0.7422	0.49407	0.594423	0.0875538
		replicate3	0.7209	0.6361	0.4665	0.6785	0.6361	0.6573	0.7422	0.6997	0.5089	0.5937	0.63399
	Control	replicate1	1.9361	2.1956	1.6567	1.9162	1.5768	1.4172	1.2774	1.6168	1.6766	1.6168	1.68862
		replicate2	1.7365	0.8782	1.5968	1.6168	2.0758	2.0559	1.8962	2.0559	2.0958	2.3353	1.83432	1.88423	0.224755
		replicate3	1.8563	2.016	2.6148	2.0758	1.7365	2.4551	1.8762	2.3752	2.5749	1.7166	2.12974
			Crakcing index	40 DAFB	47 DAFB	54 DAFB	61 DAFB
			Ca	0.0172987	0.03626	0.178862	0.59443
			Control	0.0179657	0.0445775	1.07719	1.88423
			STDEV-Ca	0.00984607	0.0106985	0.020018	0.0875651
			STDEV-Control	0.00521686	0.0160096	0.0345864	0.224753
Figure 6
Skin breaking force
		replicate1	replicate2	replicate3	AVG	STDEV
40 DAFB	Calcium	89.1178	92.9015	88.3771	90.1321	2.42677
	Control	89.1178	92.9015	88.3771	90.1321	2.42677
47 DAFB	Calcium	84.5362	86.5389	87.0259	86.0337	1.31951
	Control	72.2797	81.443	76.3932	76.7053	4.58962
54 DAFB	Calcium	64.7784	66.8295	61.7947	64.4675	2.53175
	Control	58.0867	57.6987	52.9243	56.2366	2.87506
61 DAFB	Calcium	63.2541	57.6915	59.9531	60.2996	2.79744
	Control	50.395	55.0768	52.4739	52.6486	2.34578
		40 DAFB	47 DAFB	54 DAFB	61 DAFB
	Ca	90.1322	86.0336	64.4675	60.2996
	Control	90.1322	76.7053	56.2365	52.6486
	STDEV-Ca	2.42675	1.31947	2.53175	2.79741
	STDEV-Control	2.42675	4.58957	2.87505	2.34575
Figure 7
Ca content		replicate1	replicate2	replicate3	AVG	STDEV
40 DAFB	Calcium	3.9163	3.464	3.1503	3.5102	0.385084
	Control	3.9163	3.464	3.1503	3.5102	0.385084
47 DAFB	Calcium	3.5325	3.536	3.9819	3.68347	0.258457		Ca content	40 DAFB	47 DAFB	54 DAFB	61 DAFB
	Control	2.3762	1.8721	1.6669	1.97173	0.364996		Ca	3.51021	3.68348	2.07914	1.84283
54 DAFB	Calcium	2.261	2.1257	1.8508	2.07917	0.209022		Control	3.51021	1.9717	1.29725	0.842961
	Control	1.1536	1.6097	1.1284	1.29723	0.270897
61 DAFB	Calcium	2.169	1.8176	1.5419	1.84283	0.314311		STDEV-Ca	0.38511	0.258436	0.209023	0.314295
	Control	1.0565	0.7937	0.6787	0.842967	0.193658		STDEV-Control	0.38511	0.364984	0.270868	0.193666
K content		replicate1	replicate2	replicate3	AVG	STDEV
40 DAFB	Calcium	18.4335	15.6576	12.6856	15.5922	2.87451
	Control	18.4335	15.6576	12.6856	15.5922	2.87451
47 DAFB	Calcium	27.8148	22.6753	23.4482	24.6461	2.77125		K content	40 DAFB	47 DAFB	54 DAFB	61 DAFB
	Control	25.5385	25.3041	19.8592	23.5673	3.21342		Ca	15.5922	24.6461	42.7901	50.8038
54 DAFB	Calcium	40.2873	45.363	42.7201	42.7901	2.53857		Control	15.5922	23.5673	35.6284	46.6296
	Control	32.47	38.7311	35.6842	35.6284	3.13092		STDEV-Ca	2.87448	2.77124	2.53854	2.42684
61 DAFB	Calcium	51.9786	48.0131	52.4197	50.8038	2.42686		STDEV-Control	2.87448	3.2134	3.1309	1.81003
	Control	47.5227	47.8195	44.5466	46.6296	1.81002
Mg content		replicate1	replicate2	replicate3	AVG	STDEV
40 DAFB	Calcium	0.9418	0.6794	0.842	0.821067	0.132447
	Control	0.9418	0.6794	0.842	0.821067	0.132447
47 DAFB	Calcium	0.652	0.9387	0.6968	0.7625	0.154229		Mg content	40 DAFB	47 DAFB	54 DAFB	61 DAFB
	Control	0.8355	0.6451	0.7106	0.7304	0.0967319		Ca	0.821075	0.762486	0.660926	0.882176
54 DAFB	Calcium	0.7822	0.5543	0.6463	0.660933	0.114653		Control	0.821075	0.730425	0.676507	0.850303
	Control	0.5679	0.7876	0.674	0.6765	0.109871		STDEV-Ca	0.132439	0.154232	0.114674	0.0830948
61 DAFB	Calcium	0.9354	0.9247	0.7864	0.882167	0.0831087		STDEV-Control	0.132439	0.096727	0.1099	0.180997
	Control	1.0593	0.7488	0.7429	0.850333	0.180994
B content		replicate1	replicate2	replicate3	AVG	STDEV
40 DAFB	Calcium	60.7001	60.794	54.6595	58.7179	3.51496
	Control	60.7001	60.794	54.6595	58.7179	3.51496
47 DAFB	Calcium	47.5077	53.9868	51.4016	50.9654	3.2615		B content	40 DAFB	47 DAFB	54 DAFB	61 DAFB
	Control	60.641	56.8067	51.9677	56.4718	4.34634		Ca	58.7179	50.9654	67.1995	86.3893
54 DAFB	Calcium	64.7763	67.6842	69.1379	67.1995	2.22084		Control	58.7179	56.4718	55.8322	64.9471
	Control	55.7525	59.0672	52.6768	55.8322	3.19594		STDEV-Ca	3.51498	3.26151	2.22081	5.11935
61 DAFB	Calcium	86.9733	91.1916	81.003	86.3893	5.11934		STDEV-Control	3.51498	4.34634	3.19595	4.35657
	Control	69.5469	60.8834	64.411	64.9471	4.35656
Figure 11
the number of calcium grains /um2		replicate1	replicate2	replicate3	replicate4	replicate5	AVG	STDEV
47 DAFB	Calcium	0.065	0.0539	0.0758	0.0581	0.0428	0.05912	0.012323			47 DAFB	54 DAFB	61 DAFB
	Control	0.0336	0.0504	0.0273	0.0403	0.0277	0.03586	0.00969655		Control	0.0358576	0.0180321	0.0132022
54 DAFB	Calcium	0.03	0.0355	0.0342	0.0441	0.0474	0.03824	0.00724521		Calcium	0.0591019	0.0382379	0.0253974
	Control	0.0164	0.0149	0.0134	0.0181	0.0274	0.01804	0.0055157		STDEV-Control	0.00969035	0.00554508	0.00723927
61 DAFB	Calcium	0.0319	0.0299	0.0171	0.0258	0.0222	0.02538	0.00595374		STDEV-Ca	0.0123268	0.00725557	0.00595727
	Control	0.0136	0.0098	0.0076	0.0255	0.0095	0.0132	0.00721214
Figure 12
Total pectin		replicate1	replicate2	replicate3	AVG	STDEV
40 DAFB	Calcium	3.078	3.318	3.568	3.32133	0.245017
	Control	3.078	3.318	3.568	3.32133	0.245017		Total pectin	40 DAFB	47 DAFB	54 DAFB	61 DAFB
47 DAFB	Calcium	3.342	3.394	3.566	3.434	0.117235		Ca	3.32133	3.434	3.17067	2.596
	Control	3.17	3.512	3.156	3.27933	0.201617		Control	3.32133	3.27933	2.49933	2.26
54 DAFB	Calcium	3.276	3.274	2.962	3.17067	0.180713
	Control	2.286	2.388	2.824	2.49933	0.285757		STDEV-Ca	0.245017	0.117235	0.180713	0.220735
61 DAFB	Calcium	2.514	2.428	2.846	2.596	0.220735		STDEV-Control	0.245017	0.201617	0.285757	0.0925851
	Control	2.248	2.174	2.358	2.26	0.0925851
Water-soluble pectin		replicate1	replicate2	replicate3	AVG	STDEV
40 DAFB	Calcium	0.45	0.48	0.54	0.49	0.0458258
	Control	0.45	0.48	0.54	0.49	0.0458258
47 DAFB	Calcium	0.39	0.48	0.51	0.46	0.06245		Water-soluble pectin	40 DAFB	47 DAFB	54 DAFB	61 DAFB
	Control	0.7	0.77	0.68	0.716667	0.0472582		Ca	0.49	0.46	0.693333	0.733333
54 DAFB	Calcium	0.78	0.69	0.61	0.693333	0.085049		Control	0.49	0.716667	0.766667	0.953333
	Control	0.73	0.76	0.81	0.766667	0.0404145
61 DAFB	Calcium	0.69	0.75	0.76	0.733333	0.0378594		STDEV-Ca	0.0458258	0.06245	0.085049	0.0378594
	Control	1.01	0.96	0.89	0.953333	0.0602771		STDEV-Control	0.0458258	0.0472582	0.0404145	0.0602771
CDTA-soluble pectin		replicate1	replicate2	replicate3	AVG	STDEV
40 DAFB	Calcium	1.46	1.568	1.586	1.538	0.0681469
	Control	1.46	1.568	1.586	1.538	0.0681469		CDTA-soluble pectin	40 DAFB	47 DAFB	54 DAFB	61 DAFB
47 DAFB	Calcium	1.622	1.694	1.586	1.634	0.0549909		Ca	1.538	1.634	1.484	1.106
	Control	1.28	1.496	1.37	1.382	0.108499		Control	1.538	1.382	1.046	0.776
54 DAFB	Calcium	1.496	1.514	1.442	1.484	0.03747
	Control	0.902	1.046	1.19	1.046	0.144		STDEV-Ca	0.0681469	0.0549909	0.03747	0.10547
61 DAFB	Calcium	1.064	1.028	1.226	1.106	0.10547		STDEV-Control	0.0681469	0.108499	0.144	0.09
	Control	0.776	0.686	0.866	0.776	0.09
Na2CO3-soluble pectin		replicate1	replicate2	replicate3	AVG	STDEV
40 DAFB	Calcium	1.168	1.27	1.442	1.29333	0.138482
	Control	1.168	1.27	1.442	1.29333	0.138482		Na2CO3-soluble pectin	40 DAFB	47 DAFB	54 DAFB	61 DAFB
47 DAFB	Calcium	1.33	1.22	1.47	1.34	0.1253		Ca	1.29333	1.34	0.993333	0.756667
	Control	1.19	1.246	1.106	1.18067	0.0704651		Control	1.29333	1.18067	0.686667	0.530667
54 DAFB	Calcium	1	1.07	0.91	0.993333	0.0802081
	Control	0.654	0.582	0.824	0.686667	0.124263		STDEV-Ca	0.138482	0.1253	0.0802081	0.10504
61 DAFB	Calcium	0.76	0.65	0.86	0.756667	0.10504		STDEV-Control	0.138482	0.0704651	0.124263	0.0700381
	Control	0.462	0.528	0.602	0.530667	0.0700381
Hemicellulose		replicate1	replicate2	replicate3	AVG	STDEV
40 DAFB	Calcium	1.7	1.61	1.68	1.66333	0.0472582
	Control	1.7	1.61	1.68	1.66333	0.0472582		Hemicellulose	40 DAFB	47 DAFB	54 DAFB	61 DAFB
47 DAFB	Calcium	1.59	1.54	1.52	1.55	0.0360555		Ca	1.66333	1.55	1.24667	1.18333
	Control	1.33	1.39	1.3	1.34	0.0458258		Control	1.66333	1.34	1.34	1.21333
54 DAFB	Calcium	1.18	1.3	1.26	1.24667	0.061101
	Control	1.34	1.39	1.29	1.34	0.05		STDEV-Ca	0.0472582	0.0360555	0.061101	0.0305505
61 DAFB	Calcium	1.19	1.21	1.15	1.18333	0.0305505		STDEV-Control	0.0472582	0.0458258	0.05	0.0404145
	Control	1.17	1.22	1.25	1.21333	0.0404145
Cellulose		replicate1	replicate2	replicate3	AVG	STDEV
40 DAFB	Calcium	2.06	2.11	1.87	2.01333	0.126623
	Control	2.06	2.11	1.87	2.01333	0.126623		Cellulose	40 DAFB	47 DAFB	54 DAFB	61 DAFB
47 DAFB	Calcium	1.89	1.95	1.73	1.85667	0.113725		Ca	2.01333	1.85667	1.59	1.27333
	Control	1.78	1.68	1.83	1.76333	0.0763763		Control	2.01333	1.76333	1.65	1.45333
54 DAFB	Calcium	1.63	1.48	1.66	1.59	0.0964365
	Control	1.76	1.52	1.67	1.65	0.121244		STDEV-Ca	0.126623	0.113725	0.0964365	0.0929157
61 DAFB	Calcium	1.35	1.3	1.17	1.27333	0.0929157		STDEV-Control	0.126623	0.0763763	0.121244	0.0723418
	Control	1.5	1.49	1.37	1.45333	0.0723418
Figure 13
Pectinmethylesterase		replicate1	replicate2	replicate3	AVG	STDEV
40 DAFB	Calcium	2.89	2.9	3.02	2.93667	0.0723418		Pectinmethylesterase	40 DAFB	47 DAFB	54 DAFB	61 DAFB
	Control	2.89	2.9	3.02	2.93667	0.0723418		Ca	2.93667	2.7	2.7	2.98333
47 DAFB	Calcium	2.84	2.65	2.61	2.7	0.122882		Control	2.93667	2.76333	3.01	2.99667
	Control	2.72	2.75	2.82	2.76333	0.051316
54 DAFB	Calcium	2.64	2.7	2.76	2.7	0.06		STDEV-Ca	0.0723418	0.122882	0.06	0.0832666
	Control	3.13	3.01	2.89	3.01	0.12		STDEV-Control	0.0723418	0.051316	0.12	0.0665833
61 DAFB	Calcium	2.89	3.01	3.05	2.98333	0.0832666
	Control	3.07	2.98	2.94	2.99667	0.0665833
Polygalacturonase		replicate1	replicate2	replicate3	AVG	STDEV
40 DAFB	Calcium	0.044	0.058	0.055	0.0523333	0.00737111		Polygalacturonase	40 DAFB	47 DAFB	54 DAFB	61 DAFB
	Control	0.044	0.058	0.055	0.0523333	0.00737111		Ca	0.0523333	0.0696667	0.066	0.078
47 DAFB	Calcium	0.064	0.074	0.071	0.0696667	0.0051316		Control	0.0523333	0.083	0.0943333	0.089
	Control	0.09	0.078	0.081	0.083	0.006245
54 DAFB	Calcium	0.065	0.061	0.072	0.066	0.00556776		STDEV-Ca	0.00737111	0.0051316	0.00556776	0.00556776
	Control	0.091	0.098	0.094	0.0943333	0.00351188		STDEV-Control	0.00737111	0.006245	0.00351188	0.0072111
61 DAFB	Calcium	0.072	0.083	0.079	0.078	0.00556776
	Control	0.097	0.087	0.083	0.089	0.0072111
β-galactosidase		replicate1	replicate2	replicate3	AVG	STDEV
40 DAFB	Calcium	20.19	12.47	16.15	16.27	3.8614		β-galactosidase	40 DAFB	47 DAFB	54 DAFB	61 DAFB
	Control	20.19	12.47	16.15	16.27	3.8614		Ca	16.27	26.6033	33.4133	29.7267
47 DAFB	Calcium	31.19	23.47	25.15	26.6033	4.06002		Control	16.27	30.6033	41.24	43.4
	Control	27.19	32.47	32.15	30.6033	2.96036
54 DAFB	Calcium	31.68	35.93	32.63	33.4133	2.23066		STDEV-Ca	3.8614	4.06002	2.23066	2.12768
	Control	42.43	43.74	37.55	41.24	3.26207		STDEV-Control	3.8614	2.96036	3.26207	2.54741
61 DAFB	Calcium	31.53	30.27	27.38	29.7267	2.12768
	Control	42.16	46.33	41.71	43.4	2.54741
Cellulase		replicate1	replicate2	replicate3	AVG	STDEV
40 DAFB	Calcium	0.29	0.36	0.32	0.323333	0.0351188		Cellulase	40 DAFB	47 DAFB	54 DAFB	61 DAFB
	Control	0.29	0.36	0.32	0.323333	0.0351188		Ca	0.323333	0.31	0.34	0.38
47 DAFB	Calcium	0.36	0.31	0.26	0.31	0.05		Control	0.323333	0.29	0.356667	0.433333
	Control	0.3	0.31	0.26	0.29	0.0264575
54 DAFB	Calcium	0.34	0.32	0.36	0.34	0.02		STDEV-Ca	0.0351188	0.05	0.02	0.0360555
	Control	0.35	0.34	0.38	0.356667	0.0208167		STDEV-Control	0.0351188	0.0264575	0.0208167	0.0351188
61 DAFB	Calcium	0.37	0.42	0.35	0.38	0.0360555
	Control	0.4	0.47	0.43	0.433333	0.0351188
Table 1
		replicate1	replicate2	replicate3	AVG	STDEV
Longitudinal Diameter (mm)	Calcium	23.56	24.22	22.08	23.2867	1.09587
	Control	21.48	22.74	22.24	22.1533	0.634455
Transverse diameter (mm)	Calcium	21.84	21.15	22.56	21.85	0.705053
	Control	21.94	22.17	21.06	21.7233	0.585861
Soluble solid (%)	Calcium	16.36	16.5	16.28	16.38	0.111355
	Control	15.64	16.21	15.87	15.9067	0.286764
Titratable acidity (%)	Calcium	0.29	0.31	0.27	0.29	0.02
	Control	0.4	0.33	0.36	0.363333	0.0351188
Water content (%)	Calcium	83.7337	83.1918	82.5526	83.1594	0.591202
	Control	82.306	82.5209	81.9949	82.274	0.264477
Figure S1								AVG	AVG	STDEV
0g/L	foliar spray	replicate1	92.3077	96.3662	78.3333	83.0508	95.0635	89.0243
	0g/L	replicate2	95.7143	77.6119	82.8125	92.9825	76.4407	85.1124	88.8913	3.71418
		replicate3	97.1639	91.9355	89.6552	89.3939	94.5373	92.5372
0g/L	fruit dipping	replicate1	89.2308	81.6901	90	91.5254	91.5873	88.8067
	0g/L	replicate2	84.2857	83.5821	85.9375	82.4561	71.1864	81.4896	84.5003	3.82678
		replicate3	77.377	74.1935	89.3103	94.5455	80.597	83.2047
1g/L	foliar spray	replicate1	75.7447	85.4545	83.0769	90.597	92.2807	85.4308
	1g/L	replicate2	75.3846	71.7391	83.3333	81.0345	77.7778	77.8539	82.5774	4.12016
		replicate3	96.0377	77.9661	80.7018	93.1579	74.375	84.4477
1g/L	fruit dipping	replicate1	76.5957	81.8182	81.5385	87.6119	75.4386	80.6006
	1g/L	replicate2	52.3077	89.1304	68.1818	89.6552	75.9259	75.0402	75.3714	5.07176
		replicate3	62.2642	62.7119	70.7018	75.4386	81.25	70.4733
3g/L	foliar spray	replicate1	87.234	83.6364	50.7692	76.1194	82.4561	76.043
	3g/L	replicate2	69.2308	69.5652	53.0303	72.4138	68.5185	66.5517	72.7446	5.36701
		replicate3	73.5849	77.9661	73.6842	84.2105	68.75	75.6391
3g/L	fruit dipping	replicate1	48.9362	65.4545	49.2308	61.194	64.9123	57.9456
	3g/L	replicate2	50.7692	78.2609	57.5758	51.7241	50	57.666	55.4512	4.0807
		replicate3	54.717	47.4576	56.1404	57.8947	37.5	50.7419
5g/L	foliar spray	replicate1	70.2128	56.3636	53.8462	63.7313	56.8421	60.1992
	5g/L	replicate2	53.8462	67.3913	39.3939	48.2759	47.4074	51.2629	58.7528	6.88161
		replicate3	66.0377	64.2373	68.5965	63.8596	61.25	64.7962
5g/L	fruit dipping	replicate1	31.9149	30.9091	32.3077	28.3582	29.8246	30.6629
	5g/L	replicate2	36.9231	58.6957	27.2727	34.4828	40.7407	39.623	34.5091	4.61262
		replicate3	39.6226	32.2034	40.3509	36.8421	17.1875	33.2413
8g/L	foliar spray	replicate1	53.1915	56.3636	41.5385	58.806	63.8596	54.7518
	8g/L	replicate2	49.2308	45.6522	37.2727	51.7241	48.1481	46.4056	51.1274	4.27996
		replicate3	57.1698	34.2881	43.8596	57.3684	68.4375	52.2247
8g/L	fruit dipping	replicate1	80.8511	63.6364	56.9231	53.7313	71.9298	65.4143
	8g/L	replicate2	64.6154	73.4783	77.5758	67.2414	85.9259	73.7674	68.87	4.35912
		replicate3	75.4717	62.7119	64.9123	68.4211	65.625	67.4284
		0g/L	1g/L	3g/L	5g/L	8g/L
	Foliar spray	88.8913	82.5774	72.7446	58.7528	51.1274
	Fruit dipping	84.5003	75.3714	55.4512	34.5091	68.87
	STDEV	3.71419	4.12016	5.36702	6.88162	4.27996
	STDEV	3.82677	5.07177	4.0807	4.61262	4.35912
Figure S3
		replicate1	replicate2	replicate3	AVG	STDEV
40 DAFB	Calcium	1.4642	1.3974	0.5342	1.13193	0.518729
	Control	0.8166	1.365	0.7236	0.9684	0.346599
47 DAFB	Calcium	1.5667	1.871	2.2475	1.89507	0.341037			40 DAFB	47 DAFB	54 DAFB	61 DAFB	68 DAFB	75DAFB
	Control	1.8648	3.2596	4.2396	3.12133	1.19342		Ca	1.13193	1.89507	10.1869	28.1368	33.5177	36.2792
54 DAFB	Calcium	9.8022	9.9671	10.7913	10.1869	0.529908		Control	0.9684	3.12133	51.0637	82.2865	87.8915	84.9714
	Control	50.7257	52.7982	49.6672	51.0637	1.59263
61 DAFB	Calcium	31.6307	28.0123	24.7673	28.1368	3.43339		STDEV-Ca	0.518729	0.341037	0.529908	3.43339	3.6248	3.0529
	Control	77.833	85.0957	83.9308	82.2865	3.90058		STDEV-Control	0.346599	1.19342	1.59263	3.90058	2.85596	3.34527
68 DAFB	Calcium	37.4157	30.2483	32.8892	33.5177	3.6248
	Control	85.0306	90.7425	87.9015	87.8915	2.85596
75 DAFB	Calcium	39.7175	33.8865	35.2335	36.2792	3.0529
	Control	81.4038	85.4725	88.0378	84.9714	3.34527
Figure S4
ratio of Ca/(Ca+K+Mg)		replicate1	replicate2	replicate3	AVG	STDEV
40 DAFB	Calcium	0.1681	0.1749	0.1889	0.1773	0.0106057
	Control	0.1681	0.1749	0.1889	0.1773	0.0106057		ratio of Ca/(Ca+K+Mg)	40 DAFB	47 DAFB	54 DAFB	61 DAFB
47 DAFB	Calcium	0.1104	0.1302	0.1416	0.1274	0.0157873		Ca	0.177325	0.127401	0.0457853	0.0344504
	Control	0.0826	0.0673	0.075	0.0749667	0.00765005		Control	0.177325	0.0749659	0.034327	0.0173758
54 DAFB	Calcium	0.0522	0.0442	0.0409	0.0457667	0.00581062
	Control	0.0337	0.0391	0.0301	0.0343	0.0045299		STDEV-Ca	0.010576	0.0157806	0.00578024	0.00572881
61 DAFB	Calcium	0.0394	0.0358	0.0282	0.0344667	0.00571781		STDEV-Control	0.010576	0.00767999	0.00454621	0.00344787
	Control	0.0213	0.0161	0.0148	0.0174	0.00343948
